# Supplementary material for: Dietary Habits and Relationship with the Presence of Main and Trace Elements, Bisphenol A, Tetrabromobisphenol A, and the Lipid, Microbiological and Immunological Profiles of Breast Milk
Source: MDPI journal article supplement (doi:10.3390/nu13124346), 2021-12-02
Supplement: s1 [file s1]

# Dietary Habits and Relationship with the Presence of Main and Trace Elements, Bisphenol A, Tetrabromobisphenol A, and the Lipid, Microbiological and Immunological Profiles of Breast Milk

Irma Castro, Rebeca Arroyo, Marina Aparicio, María Ángeles Martínez, Joaquim Rovira, Susana Ares, Sara Cristina Cunha, Susana Casal, Jose Oliveira Fernandes, Marta Schuhmacher, Martí Nadal, Juan Miguel Rodríguez, Leónides Fernández

## SUPPLEMENTARY INFORMATION

### FOOD FREQUENCY QUESTIONNAIRE

#### INSTRUCTIONS

Please, fill out this questionnaire calmly. Take as much time as you consider necessary.

In this questionnaire you are asked to indicate how often you regularly consume certain foods during the LACTATION period.

The frequency of consumption must be specified in the boxes to the right of the list of foods in this questionnaire. For each food item in the list, you should write down the number of times you consume it.

- If you consume it every day of the week, write a 7 in the “A WEEK” column. You should always add up the consumption of all the meals of the day (breakfast, lunch, snacks, dinner, other...). For example, if you drink milk every day for breakfast and sometimes for dinner:  $7 + 4 = 11$  times a week.
- If you never or rarely consume it, leave the box blank, without writing anything.

### FOOD FREQUENCY QUESTIONNAIRE

| FOOD ITEM                                     | HOW MANY TIMES |         |
|-----------------------------------------------|----------------|---------|
|                                               | A WEEK         | A MONTH |
| Milk                                          |                |         |
| Yoghurt                                       |                |         |
| Chocolate: tablet, bonbons, bars...           |                |         |
| Breakfast cereals (“Corn-Flakes”, “Kellog’s”) |                |         |
| Biscuits (María-type)                         |                |         |
| Cookies, cream-filled cookies                 |                |         |
| Muffins, sponge cake ...                      |                |         |
| Pastry (ensaimada-type), donut, croissant...  |                |         |

| FOOD ITEM                                            | HOW MANY TIMES |         |
|------------------------------------------------------|----------------|---------|
|                                                      | A WEEK         | A WEEK  |
| Salad: lettuce, tomato, escarole...                  |                |         |
| Green beans, chard, spinach                          |                |         |
| Garnish vegetables: eggplant, zucchini, mushrooms... |                |         |
| Potatoes (baked, fried, boiled)                      |                |         |
| Pulses: lentils, chickpeas, white beans...           |                |         |
| Rice (boiled, paella)                                |                |         |
|                                                      | A WEEK         | A MONTH |
| Pasta: noodles, macaroni, spaghetti...               |                |         |
| Soups and creams                                     |                |         |
|                                                      | A WEEK         | A MONTH |
| Eggs                                                 |                |         |
| Chicken or turkey                                    |                |         |
| Beef, pork, lamb (steak, pie...)                     |                |         |
| Minced meat: sausage, hamburger...                   |                |         |
| White fish: hake, halibut...                         |                |         |
| Blue fish: sardine, tuna, salmon ...                 |                |         |
| Seafood: mussels, shrimps, prawns, octopus, squid... |                |         |
| Croquettes, pasties, pizza                           |                |         |
| Bread (sandwich, loaf)                               |                |         |

| FOOD ITEM                                                  | HOW MANY TIMES |         |
|------------------------------------------------------------|----------------|---------|
|                                                            | A WEEK         | A WEEK  |
| Cured ham, cooked ham, sausages                            |                |         |
| Fresh cheese or low-fat cheese                             |                |         |
| Cured or semicured cheese, cream cheese                    |                |         |
|                                                            | A WEEK         | A MONTH |
| Citrus fruits: orange, tangerine                           |                |         |
| Other fruits: apple, pear, peach, apricot, ripe banana     |                |         |
| Canned fruit (in syrup)                                    |                |         |
| Fresh fruit juices                                         |                |         |
| Commercial fruit juices                                    |                |         |
| Nuts: peanuts, hazelnut, almonds                           |                |         |
| Dairy desserts: custard, milk flan, cottage cheese         |                |         |
| Cream- or chocolate-filled pastries                        |                |         |
| High-fat savory snacks (potato chips, Cheetos, corn chips) |                |         |
| Candies or ice-cream                                       |                |         |

|                                                                    | A WEEK | A MONTH |
|--------------------------------------------------------------------|--------|---------|
| Sugar-sweetened beverages (cola-type or other soft drinks)         |        |         |
| Low calorie beverages (soft drinks with low-calorie sweeteners...) |        |         |
| Wine, sangría                                                      |        |         |
| Beer                                                               |        |         |
| Alcohol-free beer                                                  |        |         |
| Distilled spirits (whisky, gin, brandy...)                         |        |         |

|                                                                 | HOW MANY TIMES |        |
|-----------------------------------------------------------------|----------------|--------|
|                                                                 | A WEEK         | A WEEK |
| Do you eat in a plastic lunch or Tupperware box?                |                |        |
| Do you heat your food in a plastic lunch or Tupperware box?     |                |        |
| Do you consume food packaged in TetraBrik or plastic containers |                |        |
| Do you consume canned fish/seafood (tuna, sardine, cockles,     |                |        |
| Do you consume other canned food (lentils, bean stew...)        |                |        |
| Do you consume food packaged in plastic (fruit, meat or fish in |                |        |
| Do you eat fast food?                                           |                |        |
